# Supplementary material
Source: Springer Nature journal article supplement (https://www.springermedizin.de/resource/supplementary/12913_2013_3042_MOESM2_ESM.pdf/9532256)

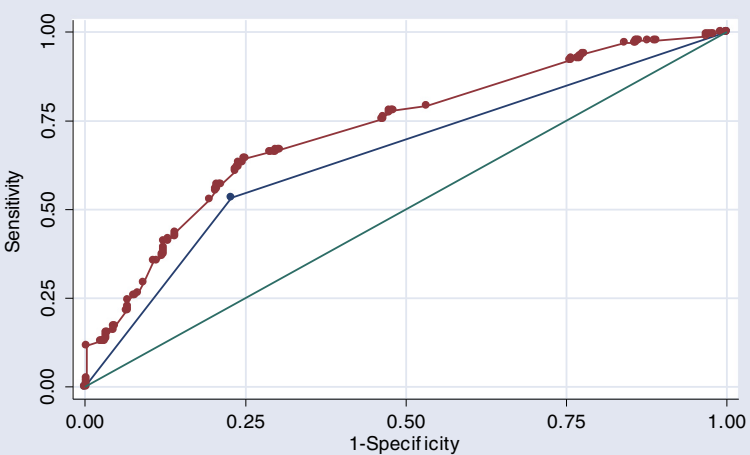

Model\_1 ROC area: 0.6528      Model\_2 ROC area: 0.724  
Reference

Supplement: MOESM2 [file 9532256]
